# Supplementary material for: Silver nanoparticles as a solid sorbent in ultrasound-assisted dispersive micro solid-phase extraction for the atomic absorption spectrometric determination of mercury in water samples
Source: Royal Society of Chemistry journal article supplement (doi:10.1039/c5ja00344j), 2015-01-01
Supplement: c5ja00344j1.pdf [file c5ja00344j1.pdf]

## Electronic Supplementary Information (ESI)

### **Silver nanoparticles as solid sorbent in ultrasound-assisted dispersive micro solid-phase extraction for the atomic absorption spectrometric determination of mercury in water samples**

Magdalena Krawczyk, Ewa Stanisław\*

Faculty of Chemical Technology,

Poznań University of Technology, Berdychowo 4, 60-965 Poznań, Poland

\* Corresponding author: tel.: +48 61 665 2005; fax: +48 61 665 2571.

E-mail address: Ewa.Stanisław@put.poznań.pl (E.Stanisław).

#### **1. Instrumentation**

Analytik Jena ContrAA 700 spectrometer comprises a compact high-resolution double echelle monochromator and a charge-coupled device (CCD) array detector with a resolution of about 2 pm per pixel in the far-ultraviolet range. In this research, a transversely heated graphite atomizer (ET) with pyrolytically coated graphite tubes was employed for atomization of analyte.

The operating parameters of the HR-CS ETAAS instrument during mercury determination after AgNPs USA DMSPE are summarized in Table S1.

For SPE procedure the AgNPs were weighed using an M2P microanalytical balance (Sartorius, Gottingen, Germany) with a resolution of 1 µg (electronic weighing range up to 2 g). The pH values were measured with a pH-meter (pH 211 Microprocessor, Hanna Instruments, Kehl, Germany) supplied with a glass-combined electrode. In the first stage of the study, the samples with AgNPs were shaking using a Genius 3 vortex mixing machine (IKA, Staufen, Germany). A Sonopuls HD 70 ultrasonic cell disruptor/homogenizer (70 W, 20 kHz, Bandelin, Germany) equipped with a 2-mm titanium microtip was used for dispersive extraction processes. Ultrasonic energy was fixed at any desired level using a power setting in the 10-65 W for 2-mm titanium microtip. Additionally, a centrifuge (Model EBA 20, Hettich, Germany) was employed for phase separation after extraction procedure.

**Table S1**

Optimized experimental conditions for ultrasound-assisted dispersive micro solid-phase extraction (USA DMSPE) with AgNPs as sorbent material prior to AAS determination of mercury (parameters for HR-CS ETAAS are also presented).

| <i>USA DMSPE with AgNPs</i>                                                |                                                                      |
|----------------------------------------------------------------------------|----------------------------------------------------------------------|
| Sample volume (mL)                                                         | 10                                                                   |
| Amount of AgNPs (mg)                                                       | 10                                                                   |
| pH of sample solution                                                      | 3.5                                                                  |
| Sonication time (min)                                                      | 0.5                                                                  |
| Centrifugation time (min)                                                  | 1                                                                    |
| Solvent for solid phase / concentration (mol L <sup>-1</sup> ) / vol. (μL) | HNO <sub>3</sub> / 7 / 200                                           |
| <i>HR-CS ET AAS detection</i>                                              |                                                                      |
| Wavelength (nm)                                                            | 253.6519                                                             |
| Lamp current (A)                                                           | 9                                                                    |
| Spectral range (pixel)                                                     | 200                                                                  |
| Dispersion (pm pixel <sup>-1</sup> )                                       | 2                                                                    |
| Read time (s)                                                              | 5                                                                    |
| Delay time (s)                                                             | 0                                                                    |
| Measurement mode                                                           | peak height                                                          |
| Sample volume (μL)                                                         | 20                                                                   |
| Modifier                                                                   | Pd(NO <sub>3</sub> ) <sub>2</sub> /Mg(NO <sub>3</sub> ) <sub>2</sub> |
| Modifier concentration (μg μL <sup>-1</sup> )                              | 2                                                                    |
| Modifier volume (μL)                                                       | 5                                                                    |
| <i>Furnace program steps</i>                                               |                                                                      |
| Drying                                                                     | 80 °C, ramp 6 °C s <sup>-1</sup> , hold 20 s                         |
| Drying                                                                     | 90 °C, ramp 3 °C s <sup>-1</sup> , hold 20 s                         |
| Drying                                                                     | 120 °C, ramp 5 °C s <sup>-1</sup> , hold 10 s                        |
| Pyrolysis                                                                  | 300 °C, ramp 50 °C s <sup>-1</sup> , hold 20 s                       |
| Atomization                                                                | 1300 °C, ramp 2000 °C s <sup>-1</sup> , hold 3 s                     |
| Cleanout                                                                   | 1600 °C, ramp 500 °C s <sup>-1</sup> , hold 4 s                      |

## 2. Preconcentration and AAS determination procedures

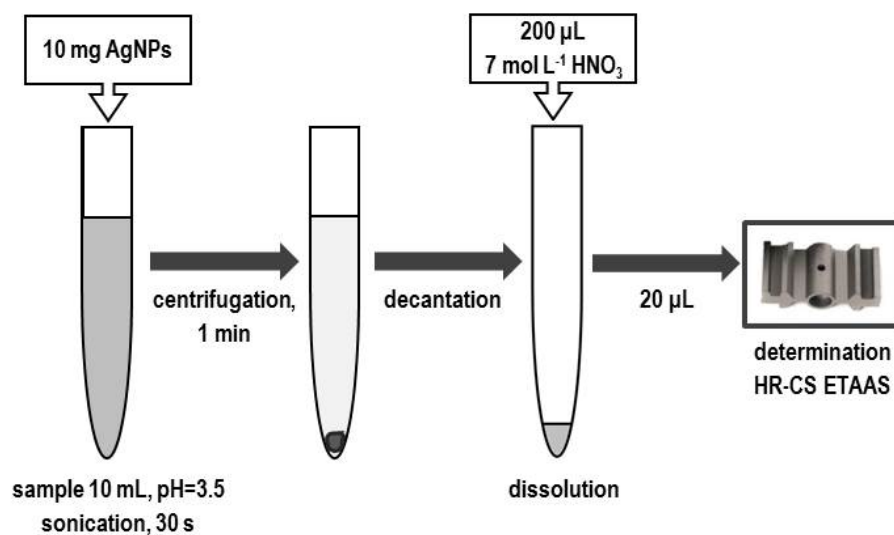

**Fig. S1.** Schematic diagram for AgNPs ultrasound-assisted micro dispersive SPE procedure combined with HR-CS ETAAS for the determination of mercury.

### 3. Results and Discussion

#### 3.1 Optimization of AgNPs USA MDSPE conditions

##### 3.1.1. Particles amount

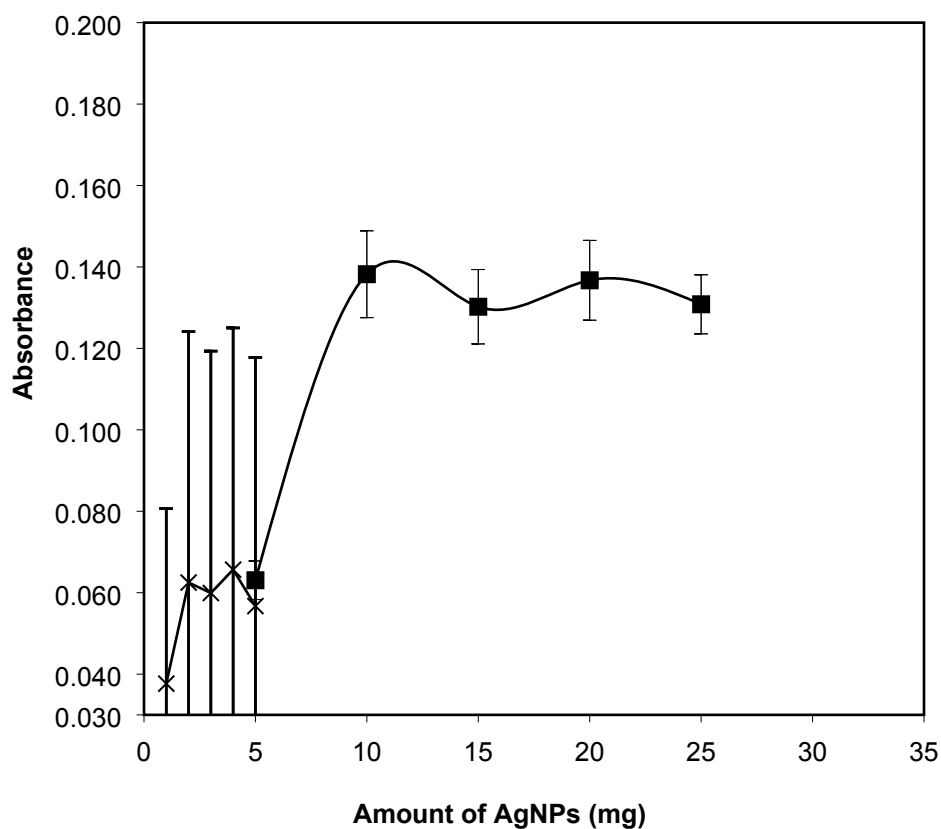

**Fig. S2.** Effect of amount of AgNPs on the determination of  $\text{Hg}^{2+}$  with the use of USA MDSPE procedure. Conditions: pH=3.5, sample volume 10 mL, sonication time 40 s, centrifugation 1 min, dissolution of AgNPs after extraction in 250  $\mu\text{L}$  of 7 mol  $\text{L}^{-1}$   $\text{HNO}_3$ . The error bar is the standard deviation (SD,  $n=3$ ).

### 3.1.2. Sample pH

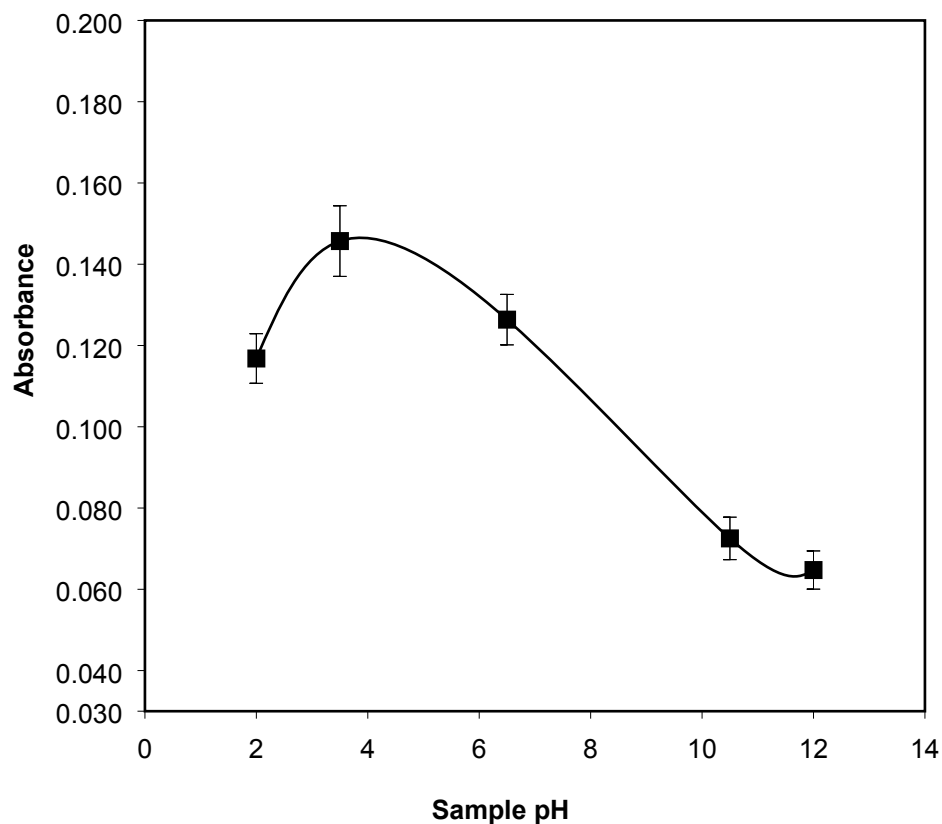

**Fig. S3.** Effect of sample pH on the determination of  $\text{Hg}^{2+}$  with the use of USA MDSPE procedure. Conditions: sample volume 10 mL, 10 mg of AgNPs, sonication time 30 s centrifugation 1 min, dissolution of AgNPs after extraction in 250  $\mu\text{L}$  of 7 mol  $\text{L}^{-1}$   $\text{HNO}_3$ . The error bar is the standard deviation (SD,  $n=3$ ).

### 3.1.3. Sonication and centrifugation time

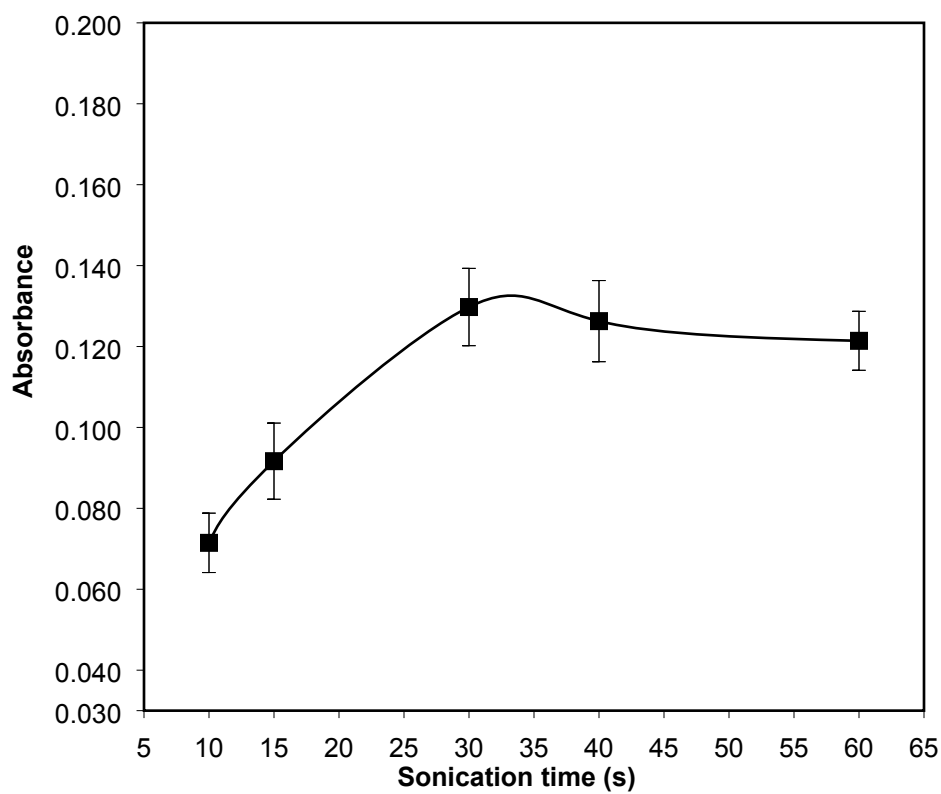

**Fig. S4.** Effect of sonication time on the determination of  $\text{Hg}^{2+}$  with the use of USA MDSPE procedure. Conditions: pH=3.5, sample volume 10 mL, 10 mg of AgNPs, centrifugation 1 min, dissolution of AgNPs after extraction in 250  $\mu\text{L}$  of 7 mol  $\text{L}^{-1}$   $\text{HNO}_3$ . The error bar is the standard deviation (SD,  $n=3$ ).

### 3.1.4. Dissolution of solid phase after extraction step

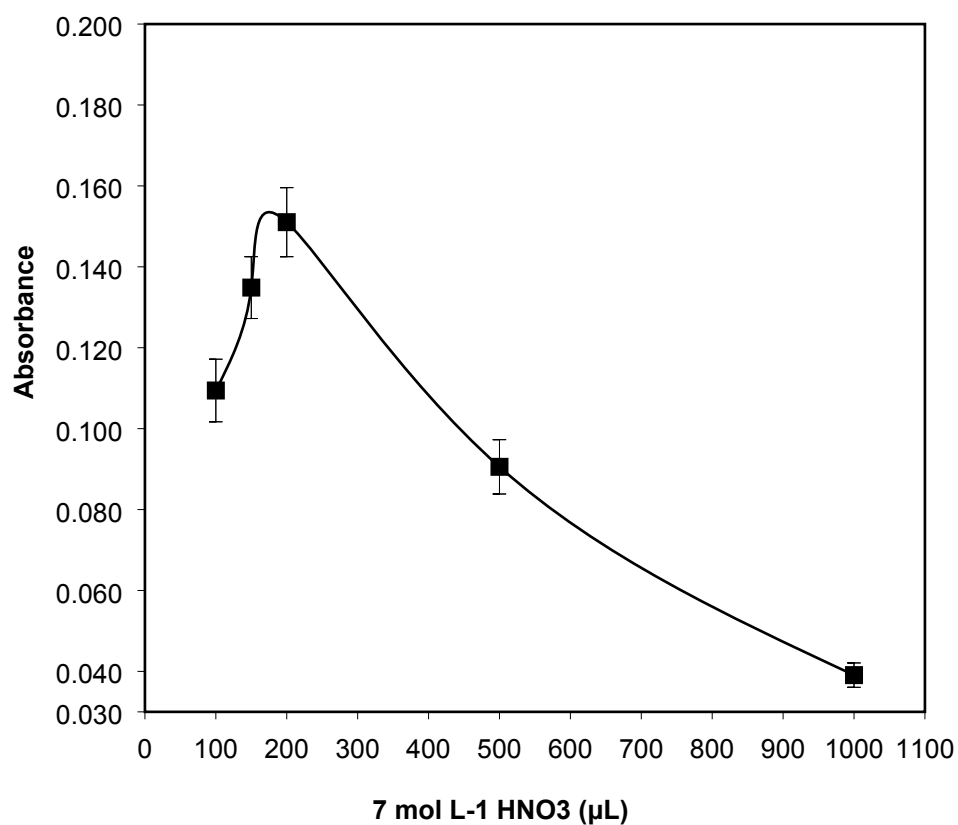

**Fig. S5.** Effect of volume of 7 mol L<sup>-1</sup> HNO<sub>3</sub> (used as dissolving solution for solid phase after extraction) on the determination of Hg<sup>2+</sup> with the use of USA MDSPE procedure. Conditions: pH=3.5, sample volume 10 mL, 10 mg of AgNPs, sonication time 30 s, centrifugation 1 min. The error bar is the standard deviation (SD, n= 3).
